# Supplementary material for: Delivering Bad News in Clinical Practice: The Role of Communication Skills and Emotional Intelligence Among Polish Healthcare Professionals
Source: Research Square preprint supplement (doi:10.21203/rs.3.rs-6835121/v1), 2025-09-09
Supplement: Supplementary file 1 [file c2d8013b3327b39cec8d2cf4.docx]

Supplementary Tables

# Table 1. Demographic Characteristics of Participants

| Category | Subcategory | N (%) |
| --- | --- | --- |
| Gender | Female | 690 (74.27%) |
|  | Male | 239 (25.73%) |
| Occupation | Nurse | 252 (27.13%) |
|  | Physician | 169 (18.19%) |
|  | Paramedic | 221 (23.79%) |
|  | Midwife | 218 (23.47%) |
|  | Physiotherapist | 69 (7.43%) |
| Professional Experience | Less than 5 years | 51 (5.49%) |
|  | 5-10 years | 502 (54.04%) |
|  | 10-20 years | 270 (29.06%) |
|  | More than 20 years | 106 (11.41%) |
| Education | Bachelor's degree | 96 (10.33%) |
|  | Master's degree | 833 (89.67%) |
| Workplace | Clinical/University Hospital | 754 (81.16%) |
|  | Provincial/District Hospital | 175 (18.84%) |

## Table 2. Differences in mean scores for communication skills, emotional intelligence and attitudes towards breaking bad news

| Variable | M ± SD | t (Student’s) | p-value |
| --- | --- | --- | --- |
| HP-CSS |  |  |  |
| – Empathy | 4.35 ± 0.25 | 0.17 | 0.86 |
| – Informative Communication | 4.81 ± 0.32 | -0.02 | 0.98 |
| – Respect | 4.67 ± 0.40 | -0.63 | 0.53 |
| – Social Skills | 4.83 ± 0.30 | 0.30 | 0.77 |
| INTE |  |  |  |
| – INTE I (emotional reasoning) | 65.42 ± 5.00 | 0.06 | 0.95 |
| – INTE II (emotion recognition) | 43.38 ± 3.01 | -0.35 | 0.73 |
| – Total INTE | 127.08 ± 10.91 | -0.12 | 0.91 |
| BBNAS |  |  |  |
| – SPIKES adherence | 32.40 ± 2.09 | 0.95 | 0.34 |
| – Openness to BBN | 13.10 ± 1.03 | -0.11 | 0.90 |

*Note: INTE I – using emotions in reasoning; BBN – Breaking Bad News; HP-CSS – Health Professional Communication Skills Scale.*

## Table 3. ANOVA results for communication and emotional intelligence scores across professional groups

| Variable | F | df | p-value |
| --- | --- | --- | --- |
| Empathy | 5.12 | 4, 924 | <0.001 |
| Informative Communication | 4.68 | 4, 924 | 0.001 |
| Respect | 3.45 | 4, 924 | 0.008 |
| INTE I | 2.89 | 4, 924 | 0.023 |
| INTE II | 1.75 | 4, 924 | 0.135 |

## Table 4. Pearson’s correlations between emotional intelligence, communication skills, and attitudes towards breaking bad news (N = 929)

| Variable | INTE I | INTE II | Total INTE | Empathy | Informative Communication | Respect | SPIKES | Openness to BBN |
| --- | --- | --- | --- | --- | --- | --- | --- | --- |
| INTE I | — | 0.64** | 0.91** | 0.21** | 0.28** | 0.18* | 0.30** | 0.15* |
| INTE II | 0.64** | — | 0.75** | 0.19* | 0.25** | 0.11 | 0.20** | 0.09 |
| Total INTE | 0.91** | 0.75** | — | 0.22** | 0.30** | 0.17* | 0.28** | 0.13 |
| Empathy | 0.21** | 0.19* | 0.22** | — | 0.44** | 0.36** | 0.18* | 0.16* |
| Informative Communication | 0.28** | 0.25** | 0.30** | 0.44** | — | 0.39** | 0.35** | 0.21** |
| Respect | 0.18* | 0.11 | 0.17* | 0.36** | 0.39** | — | 0.22** | -0.12 |
| SPIKES | 0.30** | 0.20** | 0.28** | 0.18* | 0.35** | 0.22** | — | 0.27** |
| Openness to BBN | 0.15* | 0.09 | 0.13 | 0.16* | 0.21** | -0.12 | 0.27** | — |

## *Note: INTE I – using emotions in reasoning; BBN – Breaking Bad News; HP-CSS – Health Professional Communication Skills Scale.*

## Table 5A. Stepwise regression model predicting SPIKES adherence

| Predictor | β | p |
| --- | --- | --- |
| Informative communication | 0.13 | <0.0001 |
| INTE I – using emotions in reasoning | 0.25 | <0.0001 |
| INTE II – recognising emotions | –0.23 | <0.0001 |

## Table 5B. Stepwise regression model predicting openness to breaking bad news

| Predictor | β | p |
| --- | --- | --- |
| Respect (HP-CSS) | –0.09 | 0.0041 |
| Informative communication (HP-CSS) | 0.08 | 0.0106 |
